# Supplementary material for: Infectivity and antigenicity of SARS-CoV-2 B.1.617 variants
Source: Research Square preprint supplement (doi:10.21203/rs.3.rs-596463/v1), 2021-06-10
Supplement: Supplementary file 2 [file bf38e70abcf11bbde0711c23.xlsx]

## Sheet: Sheet1
Name	Oligonucleotides
T19R-F	CAGCCAGTGCGTGAATCTGAGAACCAGAACCCAGCTG
T95I-F	GACGGCGTGTACTTCGCCAGCATCGAGAAGAGCAATATCATCAG
G142D-F	CAATGACCCTTTCCTGGACGTTTATTATCATAAGAACAA
E154K-F	CAACAAGAGCTGGATGAAGAGCGAGTTCCGCGTATA
FR157-158Del-F	GAGCTGGATGGAGAGCGAGGTATATTCGTCGGCTA
L452R-F	TTGGAGGCAATTACAATTACCGGTACAGACTGTTCAGAAAGAG
T478K-F	ATCTACCAGGCCGGCAGCAAACCGTGTAATGGCGTG
E484Q-F	CACCGTGTAATGGCGTGCAGGGCTTCAATTGCTACTTC
E484K-F	CGTGTAATGGCGTGAAGGGCTTCAATTGCTACTTCCCT
D614G-F	GTGGCCGTGCTGTACCAGGGCGTGAATTGCACCGAGGT
P681R-F	CAGACCCAGACCAATAGCAGAAGAAGAGCCAGAAGC
D950N-F	CTGGGCAAGCTGCAGAACGTGGTGAATCAGAATG
Q1071H-F	GACCTACGTGCCTGCCCACGAGAAGAATTTCACC
H1101D-F	CGTGAGCAATGGCACCGACTGGTTCGTGACCCA
